# Supplementary material for: Tumor suppressor ARF regulates tissue microenvironment and tumor growth through modulation of macrophage polarization
Source: PubMed Central journal article supplement (PMC5341841; doi:10.18632/oncotarget.11652), 2016-08-27
Supplement: oncotarget-07-66835-s001.pdf [file oncotarget-07-66835-s001.pdf]

## Tumor suppressor ARF regulates tissue microenvironment and tumor growth through modulation of macrophage polarization

### Supplementary Materials

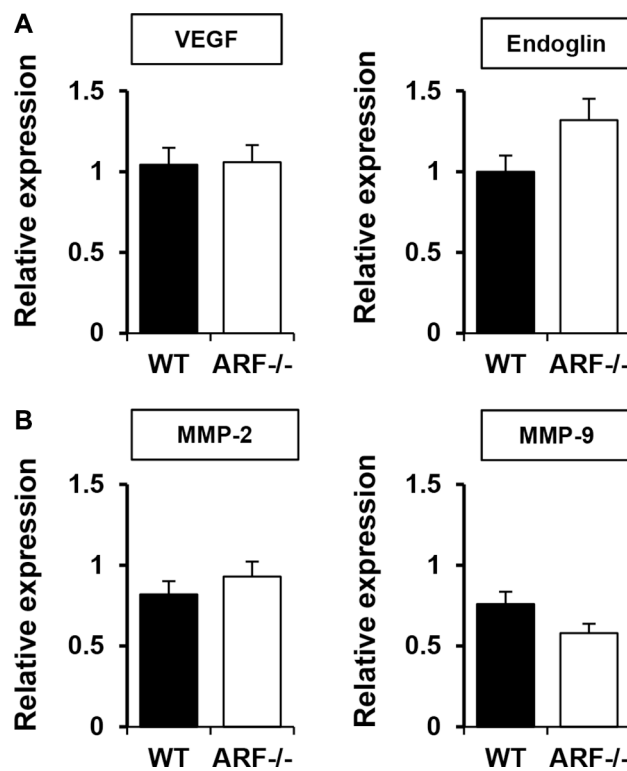

**Supplementary Figure S1: Effects of ARF deficiency in angiogenesis pathways.** mRNA expression of (A) VEGF, endoglin and (B) MMP-2, MMP-9 were evaluated by quantitative PCR in tumors from WT and ARF<sup>-/-</sup> mice. In all cases, mRNA induction levels were normalized to 36B4 mRNA expression. Data are means of each group  $\pm$  S.D. ( $n = 6$ ).

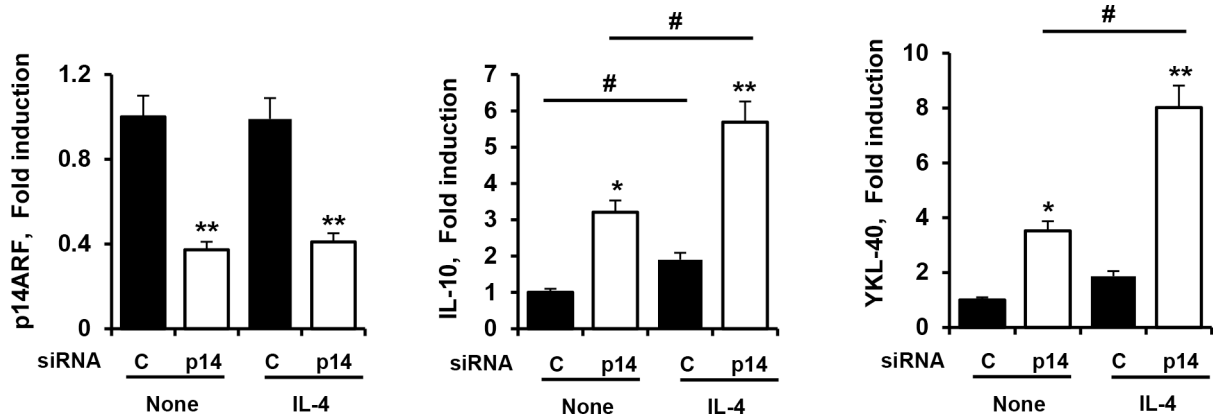

**Supplementary Figure S2: Silencing p14ARF induces M2 markers expression in THP-1 cells.** THP-1 cells were transfected with specific siRNA for p14ARF (p14) or scramble (c) and then stimulated with IL-4 (20 ng/ml) as M2 stimuli. p14ARF, IL-10 and YKL-40 expression was determined by quantitative PCR after 24 h of incubation. Data are shown as the mean  $\pm$  SD of three independent experiments, \* $P < 0.05$  and \*\* $P < 0.01$  with respect to siRNA control and # $P < 0.05$  with respect to the same siRNA condition in the absence or presence of IL-4.

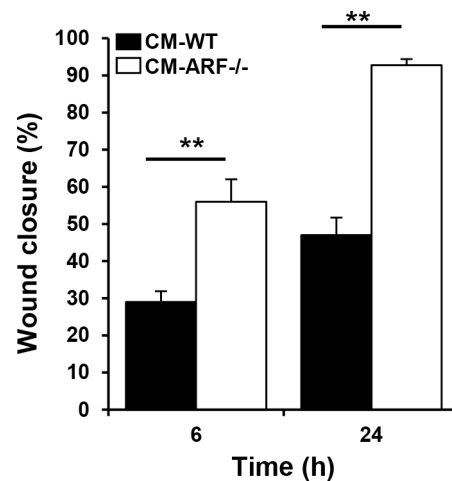

**Supplementary Figure S3: Conditioned medium from ARF<sup>-/-</sup> macrophages enhances migration of B16F10 cells.** Scratch-wound assays were performed in B16F10 cells in the presence of conditioned supernatants from WT (CM-WT) or ARF<sup>-/-</sup> (CM-ARF<sup>-/-</sup>) macrophages. Conditioned supernatants were collected from 24 h cultures of WT or ARF<sup>-/-</sup> macrophages in serum-free medium and centrifuged before use. Migration into the scratched area was photographed ( $\times 10$ ) and calculated as percentage of wound closure using the Image J software. Data are shown as the mean  $\pm$  SD of three independent experiments, \*\* $P < 0.01$  with respect to the control condition.

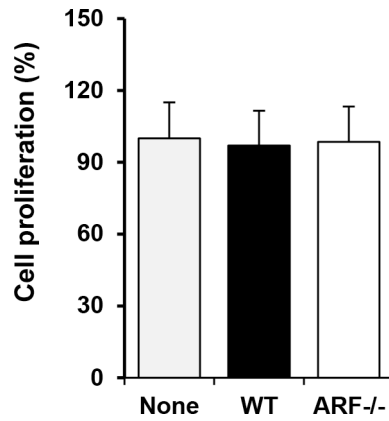

**Supplementary Figure S4: Cell proliferation of B16F10 in the presence of ARF<sup>-/-</sup> macrophages.** Peritoneal macrophages from WT and ARF<sup>-/-</sup> mice were isolated as previously described. Cell proliferation analysis was performed in B16F10 cells in the presence of macrophages from WT or ARF<sup>-/-</sup> mice using MTT assay. Data are shown as the mean  $\pm$  SD of three independent experiments.

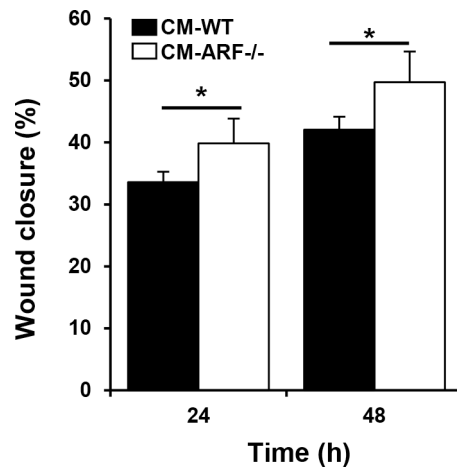

**Supplementary Figure S5: Conditioned medium from ARF<sup>-/-</sup> macrophages enhances migration of endothelial cells.** Scratch-wound assays were performed in immortalized endothelial cell line MLEC-04 in the presence of conditioned supernatants from WT (CM-WT) or ARF<sup>-/-</sup> (CM-ARF<sup>-/-</sup>) macrophages. Conditioned supernatants were collected from 24 h cultures of WT or ARF<sup>-/-</sup> macrophages in serum-free medium and centrifuged before use. Immortalized endothelial line MLEC-04 was described by Hortelano et al. Cardiovascular Research 2010, 86:283–292. Migration into the scratched area was photographed ( $\times 10$ ) and calculated as percentage of wound closure using the Image J software. Data are shown as the mean  $\pm$  SD of three independent experiments, \* $P < 0.05$  respect to the control condition.

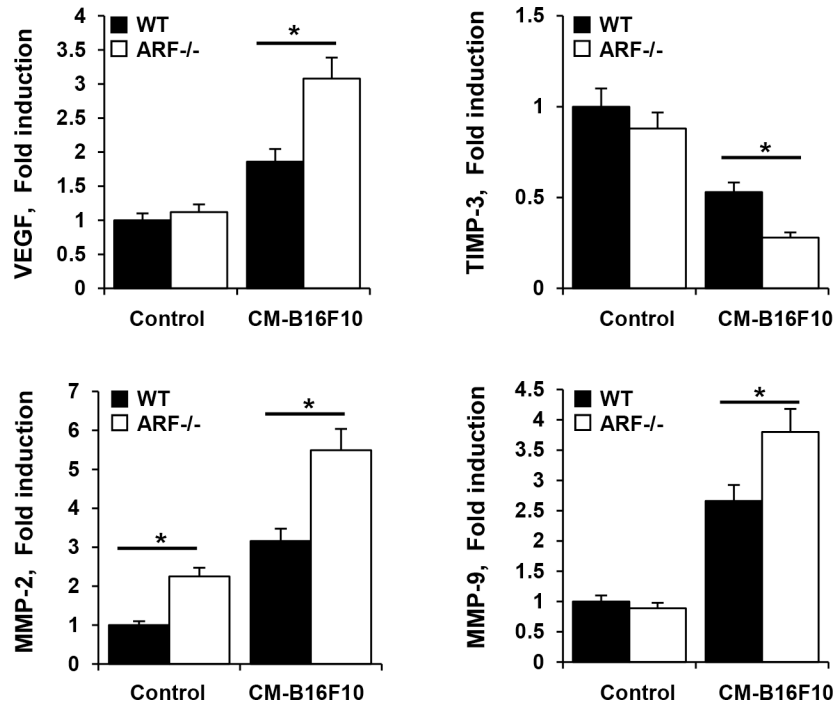

**Supplementary Figure S6: Conditioned media from B16F10 cells modulate the expression of angiogenic factors on ARF<sup>-/-</sup> macrophages.** Peritoneal macrophages from WT and ARF<sup>-/-</sup> mice were exposed to conditioned medium from B16F10 cells (CM-B16F10). VEGF, TIMP-3, MMP-2 and MMP-9 expression on macrophages was determined by quantitative PCR after 6 h of incubation. Data are shown as the mean  $\pm$  SD of three independent experiments, \* $P < 0.05$  respect to the WT condition.
